# Supplementary material for: Identification of sSIGLEC5 and sLAG3 as New Relapse Predictors in Lung Cancer
Source: MDPI journal article supplement (doi:10.3390/biomedicines10051047), 2022-04-30
Supplement: s1 [file s1]

**Supplementary Table S1.** Logistic regression model for relapse prediction in Lung Cancer.

| Variables in the equation | B        | SD       | Wald     | P-value  | OR       | OR CI 95 |          |
|---------------------------|----------|----------|----------|----------|----------|----------|----------|
|                           |          |          |          |          |          | Low      | High     |
| sLAG3 (pg/mL)             | 0.001606 | 0.000516 | 9.656418 | 0.001886 | 1.001607 | 1.000593 | 1.002622 |
| sSiglec5 (ng/mL)          | 0.003875 | 0.002010 | 3.717969 | 0.053829 | 1.003883 | 0.999936 | 1.007846 |

Wald intro logistic regression, including sLAG3 and sSiglec5. Units: sLAG3 in pg/mL and sSiglec5 in ng/mL.

B, B weight coefficient; SD, standard deviation of B; Wald, Wald statistic; OR, odds ratio; OR CI 95, 95% confidence interval of odds ratio.
