# Supplementary figures and images for: Identification of sSIGLEC5 and sLAG3 as New Relapse Predictors in Lung Cancer
Source: MDPI journal article supplement (doi:10.3390/biomedicines10051047), 2022-04-30

Supplementary Figure S1

(A)

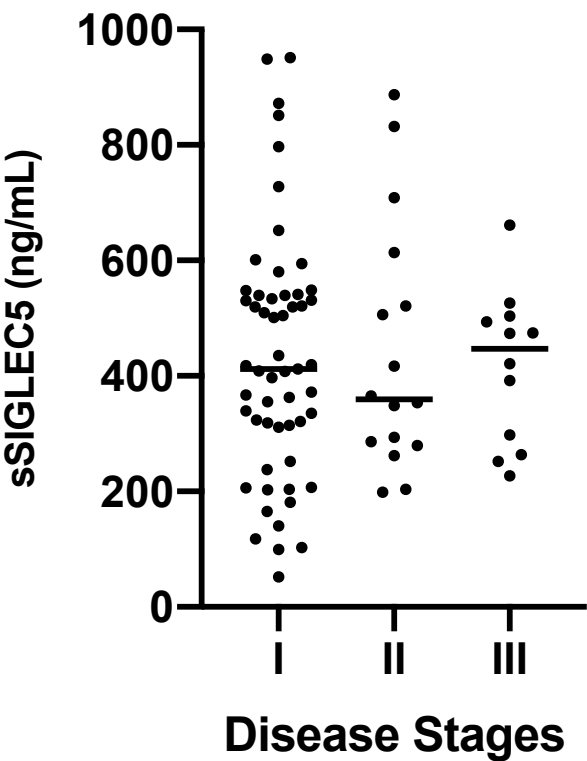

(B)

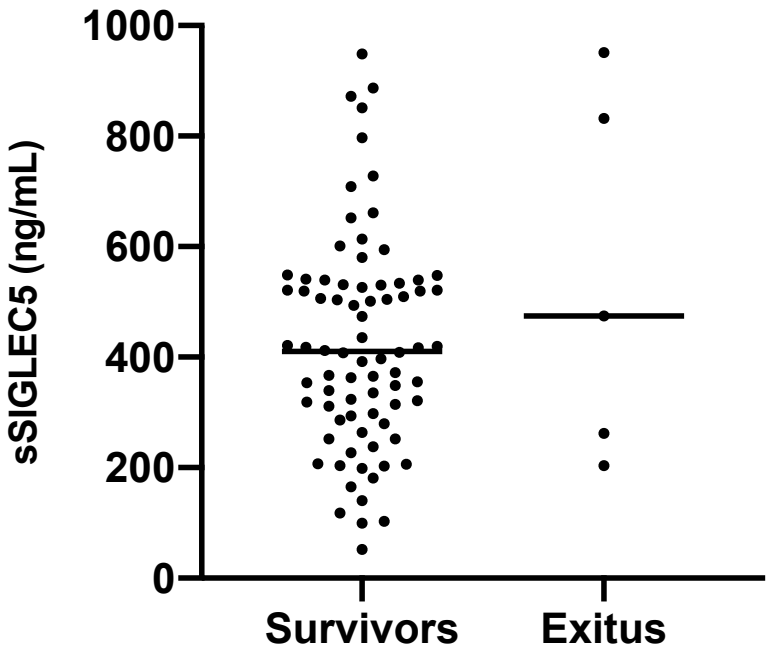

Supplement: s1 [file s1]
